# Supplementary material
Source: PubMed Central journal article supplement (PMC8513753)
Supplement: NIHMS1728492-supplement-1.pdf [file NIHMS1728492-supplement-1.pdf]

409 **Table 3. Supplement. Comparison of Failure Properties between Circumferential and Longitudinal**  
 410 **Directions.**

| Ascending Aorta            |                                        |                                        |                                        |                                        |                                        |
|----------------------------|----------------------------------------|----------------------------------------|----------------------------------------|----------------------------------------|----------------------------------------|
|                            | Anterior (n=38)                        | Medial (n=19)                          | Posterior (n=16)                       | Lateral (n=34)                         | Overall (n=107)                        |
| Failure Stress (kPa)       | 1062 (800, 1890) vs 451 (355, 786)     | 1127 (847, 1197) vs 360 (298, 553)     | 1539 (1225, 1605) vs 855 (512, 958)    | 1128 (949, 1504) vs 839 (506, 1074)    | 1139 (868, 1554) vs 546 (355, 952)     |
| P                          | 0.003                                  | <0.001                                 | 0.013                                  | 0.058                                  | 0.001                                  |
| Failure Stretch ratio      | 1.90 (1.63, 2.13) vs 1.81 (1.65, 2.02) | 2.20 (1.52, 2.28) vs 1.80 (1.61, 2.11) | 1.86 (1.75, 2.00) vs 2.01 (1.75, 2.28) | 1.98 (1.57, 2.26) vs 1.78 (1.62, 1.99) | 1.94 (1.57, 2.25) vs 1.80 (1.64, 2.06) |
| P                          | 0.4                                    | 0.3                                    | 0.2                                    | 0.4                                    | 0.3                                    |
| Peak Tangent Modulus (kPa) | 3357 (2398, 5092) vs 1153 (791, 2403)  | 3368 (2006, 5076) vs 1025 (855, 1346)  | 3239 (2966, 3974) vs 1675 (1419, 1804) | 3730 (2626, 4292) vs 1694 (1049, 3706) | 3444 (2398, 4639) vs 1419 (918, 2367)  |
| p                          | <0.001                                 | <0.001                                 | 0.01                                   | 0.037                                  | 0.001                                  |
| Sinotubular Junction       |                                        |                                        |                                        |                                        |                                        |
|                            | Anterior (n=17)                        | Medial (n=12)                          | Posterior (n=3)                        | Lateral (n=20)                         | Overall (n=52)                         |
| Failure Stress (kPa)       | 1308 (927, 2172) vs 287 (274, 338)     | 1140 (808, 2067) vs 450 (211, 707)     | 737 (704, 770) vs n/a                  | 1233 (631, 1497) vs 664 (339, 888)     | 1233 (693, 1708) vs 348 (230, 797)     |
| p                          | 0.031                                  | 0.015                                  | n/a                                    | 0.067                                  | <0.001                                 |
| Failure Stretch ratio      | 1.63 (1.49, 1.97) vs 1.75 (1.52, 1.85) | 1.57 (1.46, 1.69) vs 2.02 (1.88, 2.33) | 1.50 (1.41, 1.59) vs n/a               | 1.50 (1.25, 1.91) vs 1.70 (1.66, 1.82) | 1.57 (1.42, 1.90) vs 1.83 (1.66, 2.08) |
| p                          | 0.5                                    | 0.023                                  | n/a                                    | 0.3                                    | 0.034                                  |
| Peak Tangent Modulus (kPa) | 4388 (2810, 8809) vs 1375 (938, 1575)  | 6197 (3808, 9019) vs 605 (484, 1085)   | 3971 (3780, 4161) vs n/a               | 3988 (2494, 8152) vs 2436 (903, 3418)  | 4272 (2830, 8809) vs 1151 (536, 2718)  |
| p                          | 0.015                                  | 0.004                                  | n/a                                    | 0.041                                  | <0.001                                 |
| Sinus of Valsalva          |                                        |                                        |                                        |                                        |                                        |
|                            | RCS (n=13)                             | LCS (n=11)                             | NCS (n=14)                             | Overall (n=38)                         |                                        |
| Failure Stress (kPa)       | 1338 (1046, 2682) vs 332 (288, 539)    | 2205 (1067, 2699) vs 342 (211, 546)    | 1135 (749, 2126) vs 576 (437, 782)     | 1344 (874, 2576) vs 454 (279, 657)     |                                        |
| p                          | n/a                                    | 0.06                                   | 0.09                                   | <0.001                                 |                                        |
| Failure Stretch Ratio      | 1.82 (1.59, 2.05) vs 1.65 (1.53, 2.41) | 1.86 (1.73, 2.03) vs 1.82 (1.57, 1.90) | 1.50 (1.41, 1.80) vs 1.80 (1.69, 1.93) | 1.77 (1.52, 2.01) vs 1.74 (1.52, 2.05) |                                        |

|                            |                                       |                                     |                                       |                                      |  |
|----------------------------|---------------------------------------|-------------------------------------|---------------------------------------|--------------------------------------|--|
| p                          | n/a                                   | 0.4                                 | 0.25                                  | 0.048                                |  |
| Peak Tangent Modulus (kPa) | 6147 (4038, 11141) vs 855 (420, 1184) | 6853 (950, 10190) vs 527 (305, 867) | 4783 (4386, 6603) vs 1111 (843, 2073) | 5693 (2586, 9536) vs 866 (397, 1322) |  |
| p                          | n/a                                   | 0.042                               | 0.008                                 | <0.001                               |  |

411 RCS: right coronary sinus. LCS: left coronary sinus. NCS: noncoronary sinus.

412 **Table 4. Supplement. Comparison of Failure Properties of aTAA Regions.**

| Ascending Aorta vs STJ Circumferential    |                                        |                                        |                                        |                                        |                                        |
|-------------------------------------------|----------------------------------------|----------------------------------------|----------------------------------------|----------------------------------------|----------------------------------------|
|                                           | Anterior                               | Medial                                 | Posterior                              | Lateral                                | Overall                                |
| Failure stress (kPa)                      | 1062 (800, 1890) vs 1308 (927, 2172)   | 1127 (847, 1197) vs 1140 (808, 2067)   | 1539 (1225, 1605) vs 737 (704, 770)    | 1128 (949, 1504) vs 1233 (631, 1497)   | 1139 (868, 1554) vs 1233 (693, 1708)   |
| p                                         | 0.2                                    | 0.4                                    | N/A                                    | 0.5                                    | 0.5                                    |
| Failure stretch ratio                     | 1.90 (1.63, 2.13) vs 1.63 (1.49, 1.97) | 2.20 (1.52, 2.28) vs 1.57 (1.46, 1.69) | 1.86 (1.75, 2.00) vs 1.50 (1.41, 1.59) | 1.98 (1.57, 2.26) vs 1.50 (1.25, 1.91) | 1.94 (1.57, 2.25) vs 1.57 (1.42, 1.90) |
| p                                         | 0.2                                    | 0.2                                    | N/A                                    | 0.03                                   | 0.003                                  |
| Peak tangent modulus (kPa)                | 3357 (2399, 5092) vs 4388 (2810, 8809) | 3368 (2006, 5076) vs 6197 (3808, 9019) | 3239 (2966, 3974) vs 3971 (3780, 4161) | 3730 (2626, 4292) vs 3988 (2494, 8152) | 3444 (2398, 4639) vs 4272 (2830, 8809) |
| p                                         | 0.099                                  | 0.1                                    | N/A                                    | 0.2                                    | 0.027                                  |
| Ascending Aorta vs STJ Longitudinal       |                                        |                                        |                                        |                                        |                                        |
|                                           | Anterior                               | Medial                                 | Posterior                              | Lateral                                | Overall                                |
| Failure stress (kPa)                      | 451 (355, 786) vs 287 (274, 338)       | 360 (298, 554) vs 450 (211, 707)       | 855 (512, 958) vs N/A                  | 839 (506, 1074) vs 664 (339, 888)      | 546 (355, 952) vs 348 (230, 797)       |
| p                                         | 0.1                                    | 0.4                                    | N/A                                    | 0.2                                    | 0.04                                   |
| Failure Stretch ratio                     | 1.81 (1.64, 2.02) vs 1.75 (1.52, 1.85) | 1.80 (1.61, 2.11) vs 2.02 (1.88, 2.33) | 2.01 (1.75, 2.28) vs N/A               | 1.78 (1.62, 1.99) vs 1.70 (1.66, 1.82) | 1.80 (1.64, 2.06) vs 1.83 (1.66, 2.08) |
| p                                         | 0.2                                    | 0.1                                    | N/A                                    | 0.2                                    | 0.4                                    |
| Peak tangent modulus (kPa)                | 1153 (791, 2403) vs 1375 (938, 1575)   | 1025 (855, 1346) vs 605 (484, 1085)    | 1675 (1419, 1804) vs N/A               | 1694 (1049, 3706) vs 2436 (903, 3418)  | 1419 (918, 2367) vs 1151 (536, 2718)   |
| p                                         | 0.4                                    | 0.2                                    | N/A                                    | 0.4                                    | 0.2                                    |
| Ascending Aorta vs. Sinus Circumferential |                                        |                                        |                                        |                                        |                                        |
|                                           | Anterior /RCS                          | Medial/LCS                             | Lateral/NCS                            | Overall                                |                                        |
| Failure stress (kPa)                      | 1062 (800, 1890) vs 1338 (1046, 2682)  | 1127 (847, 1197) vs 2205 (1067, 2699)  | 1128 (949, 1504) vs 1135 (749, 2126)   | 1139 (868, 1554) vs 1344 (874, 2576)   |                                        |
| p                                         | N/A                                    | 0.2                                    | 0.4                                    | 0.2                                    |                                        |

| Failure Stretch ratio                  | 1.90 (1.63, 2.13)<br>vs 1.82 (1.59, 2.05) | 2.20 (1.52, 2.28)<br>vs 1.86 (1.73, 2.03) | 1.98 (1.57, 2.26)<br>vs 1.50 (1.41, 1.80) | 1.94 (1.57, 2.25)<br>vs 1.77 (1.52, 2.01) |  |
|----------------------------------------|-------------------------------------------|-------------------------------------------|-------------------------------------------|-------------------------------------------|--|
| p                                      | N/A                                       | 0.3                                       | 0.057                                     | 0.1                                       |  |
| Peak tangent modulus (kPa)             | 3357 (2399, 5092) vs 6147 (4038, 11141)   | 3368 (2006, 5076) vs 6853 (950, 10190)    | 3730 (2626, 4292) vs 4783 (4386, 6603)    | 3444 (2398, 4639) vs 5693 (2586, 9536)    |  |
| p                                      | N/A                                       | 0.4                                       | 0.08                                      | 0.07                                      |  |
| Ascending Aorta vs. Sinus Longitudinal |                                           |                                           |                                           |                                           |  |
|                                        | Anterior/RCS                              | Medial/LCS                                | Lateral/NCS                               | Overall                                   |  |
| Failure stress (kPa)                   | 451 (355, 786)<br>vs 332 (288, 539)       | 360 (298, 554)<br>vs 342 (211, 546)       | 839 (506, 1074)<br>vs 576 (437, 782)      | 546 (355, 952)<br>vs 454 (279, 657)       |  |
| p                                      | 0.1                                       | 0.3                                       | 0.1                                       | 0.056                                     |  |
| Failure stretch ratio                  | 1.81 (1.64, 2.02)<br>vs 1.65 (1.53, 2.41) | 1.80 (1.61, 2.11)<br>vs 1.82 (1.57, 1.90) | 1.78 (1.62, 1.99)<br>vs 1.80 (1.69, 1.93) | 1.80 (1.64, 2.06)<br>vs 1.74 (1.52, 2.05) |  |
| p                                      | 0.3                                       | 0.5                                       | 0.4                                       | 0.25                                      |  |
| Peak tangent modulus (kPa)             | 1153 (791, 2403)<br>vs 855 (420, 1184)    | 1025 (855, 1346) vs 527 (305, 867)        | 1694 (1049, 3706) vs 1111 (843, 2073)     | 1419 (918, 2367) vs 866 (397, 1322)       |  |
| p                                      | 0.046                                     | 0.07                                      | 0.08                                      | 0.005                                     |  |
| STJ vs. Sinus Circumferential          |                                           |                                           |                                           |                                           |  |
|                                        | Anterior/RCS                              | Medial/LCS                                | Lateral/NCS                               | Overall                                   |  |
| Failure stress (kPa)                   | 1308 (927, 2172)<br>vs 1338 (1046, 2682)  | 1140 (808, 2067) vs 2205 (1067, 2699)     | 1233 (631, 1497) vs 1135 (749, 2126)      | 1233 (693, 1708) vs 1344 (874, 2576)      |  |
| p                                      | N/A                                       | 0.3                                       | 0.4                                       | 0.2                                       |  |
| Failure stretch ratio                  | 1.63 (1.49, 1.97)<br>vs 1.82 (1.59, 2.05) | 1.57 (1.46, 1.69)<br>vs 1.86 (1.73, 2.03) | 1.50 (1.25, 1.91)<br>vs 1.50 (1.41, 1.80) | 1.57 (1.42, 1.90)<br>vs 1.77 (1.52, 2.01) |  |
| p                                      | N/A                                       | 0.06                                      | 0.5                                       | 0.1                                       |  |
| Peak tangent modulus (kPa)             | 4388 (2810, 8809) vs 6147 (4038, 11141)   | 6197 (3808, 9019) vs 6853 (950, 10190)    | 3988 (2494, 8152) vs 4783 (4386, 6603)    | 4272 (2830, 8809) vs 5693 (2586, 9536)    |  |
| p                                      | N/A                                       | 0.4                                       | 0.3                                       | 0.3                                       |  |
| STJ vs. Sinus Longitudinal             |                                           |                                           |                                           |                                           |  |
|                                        | Anterior/RCS                              | Medial/LCS                                | Lateral/NCS                               | Overall                                   |  |
| Failure stress (kPa)                   | 287 (274, 338) vs 332 (288, 539)          | 450 (211, 707)<br>vs 342 (211, 546)       | 664 (339, 888)<br>vs 576 (437, 782)       | 348 (230, 797)<br>vs 454 (279, 657)       |  |
| p                                      | 0.3                                       | 0.4                                       | 0.5                                       | 0.4                                       |  |
| Failure stretch ratio                  | 1.75 (1.52, 1.85)<br>vs 1.65 (1.53, 2.41) | 2.02 (1.88, 2.33)<br>vs 1.82 (1.57, 1.90) | 1.70 (1.66, 1.82)<br>vs 1.80 (1.69, 1.93) | 1.83 (1.66, 2.08)<br>vs 1.74 (1.52, 2.05) |  |
| p                                      | 0.4                                       | 0.2                                       | 0.2                                       | 0.4                                       |  |

|                             |                                     |                                   |                                      |                                     |  |
|-----------------------------|-------------------------------------|-----------------------------------|--------------------------------------|-------------------------------------|--|
| Peak tangent modulus (kPa ) | 1375 (938, 1575) vs 855 (420, 1184) | 605 (484, 1085) vs 527 (305, 867) | 2436 (903, 3418) vs 1111 (843, 2073) | 1151 (536, 2718) vs 866 (397, 1322) |  |
| p                           | 0.1                                 | 0.3                               | 0.2                                  | 0.15                                |  |

413 RCS: right coronary sinus. LCS: left coronary sinus. NCS: noncoronary sinus.

414

415

416

417 **Table 5. Supplement. Comparison of Failure Properties of Subregions within AscAo, STJ, and**  
 418 **SOV.**

| Ascending Aorta Circumferential |                                        |                                        |                                        |                                        |                                        |                                        |
|---------------------------------|----------------------------------------|----------------------------------------|----------------------------------------|----------------------------------------|----------------------------------------|----------------------------------------|
|                                 | Anterior vs Medial                     | Anterior vs Posterior                  | Anterior vs Lateral                    | Medial vs Posterior                    | Medial vs Lateral                      | Posterior vs Lateral                   |
| Failure Stress (kPa )           | 1062 (800, 1890) vs 1127 (847, 1197)   | 1062 (800, 1890) vs 1539 (1225, 1605)  | 1062 (800, 1890) vs 1128 (949, 1504)   | 1127 (847, 1197) vs 1539 (1225, 1605)  | 1127 (847, 1197) vs 1128 (949, 1504)   | 1539 (1225, 1605) vs 1128 (949, 1504)  |
| p                               | 0.4                                    | 0.2                                    | 0.5                                    | 0.1                                    | 0.4                                    | 0.1                                    |
| Failure Stretch ratio           | 1.90 (1.63, 2.13) vs 2.20 (1.52, 2.28) | 1.90 (1.63, 2.13) vs 1.86 (1.75, 2.00) | 1.90 (1.63, 2.13) vs 1.98 (1.57, 2.26) | 2.20 (1.52, 2.28) vs 1.86 (1.75, 2.00) | 2.20 (1.52, 2.28) vs 1.98 (1.57, 2.26) | 1.86 (1.75, 2.00) vs 1.98 (1.57, 2.26) |
| p                               | 0.2                                    | 0.5                                    | 0.2                                    | 0.4                                    | 0.5                                    | 0.3                                    |
| Peak Tangent Modulus (kPa )     | 3357 (2398, 5092) vs 3368 (2006, 5076) | 3357 (2398, 5092) vs 3239 (2966, 3974) | 3357 (2398, 5092) vs 3730 (2626, 4292) | 3368 (2006, 5076) vs 3239 (2966, 3974) | 3368 (2006, 5076) vs 3730 (2626, 4292) | 3239 (2966, 3974) vs 3730 (2626, 4292) |
| p                               | 0.4                                    | 0.4                                    | 0.4                                    | 0.5                                    | 0.4                                    | 0.4                                    |
| Ascending Aorta Longitudinal    |                                        |                                        |                                        |                                        |                                        |                                        |
|                                 | Anterior vs Medial                     | Anterior vs Posterior                  | Anterior vs Lateral                    | Medial vs Posterior                    | Medial vs Lateral                      | Posterior vs Lateral                   |
| Failure Stress (kPa )           | 451 (355, 786) vs 360 (298, 554)       | 451 (355, 786) vs 855 (512, 958)       | 451 (355, 786) vs 839 (506, 1074)      | 360 (298, 554) vs 855 (512, 958)       | 360 (298, 554) vs 839 (506, 1074)      | 855 (512, 958) vs 839 (506, 1074)      |
| p                               | 0.1                                    | 0.046                                  | 0.055                                  | 0.004                                  | 0.007                                  | 0.4                                    |
| Failure Stretch ratio           | 1.81 (1.65, 2.02) vs 1.80 (1.61, 2.11) | 1.81 (1.65, 2.02) vs 2.01 (1.75, 2.28) | 1.81 (1.65, 2.02) vs 1.78 (1.62, 1.99) | 1.80 (1.61, 2.11) vs 2.01 (1.75, 2.28) | 1.80 (1.61, 2.11) vs 1.78 (1.62, 1.99) | 2.01 (1.75, 2.28) vs 1.78 (1.62, 1.99) |
| p                               | 0.5                                    | 0.1                                    | 0.5                                    | 0.2                                    | 0.5                                    | 0.1                                    |
| Peak Tangent Modulus (kPa )     | 1153 (791, 2403) vs 1025 (855, 1346)   | 1153 (791, 2403) vs 1675 (1419, 1804)  | 1153 (791, 2403) vs 1694 (1049, 3706)  | 1025 (855, 1346) vs 1675 (1419, 1804)  | 1025 (855, 1346) vs 1694 (1049, 3706)  | 1675 (1419, 1804) vs 1694 (1049, 3706) |
| p                               | 0.2                                    | 0.25                                   | 0.2                                    | 0.009                                  | 0.014                                  | 0.3                                    |
| STJ Circumferential             |                                        |                                        |                                        | STJ Longitudinal                       |                                        |                                        |
|                                 | Anterior vs Medial                     | Anterior vs Lateral                    | Medial vs Lateral                      | Anterior vs Medial                     | Anterior vs Lateral                    | Medial vs Lateral                      |
| Failure Stress (kPa )           | 1308 (927, 2172) vs 1140 (808, 2067)   | 1308 (927, 2172) vs 1233 (631, 1497)   | 1140 (808, 2067) vs 1233 (631, 1497)   | 287 (274, 338) vs 450 (211, 707)       | 287 (274, 338) vs 664 (339, 888)       | 450 (211, 707) vs 664 (339, 888)       |
| p                               | 0.5                                    | 0.2                                    | 0.3                                    | 0.4                                    | 0.2                                    | 0.2                                    |

|                            |                                         |                                         |                                        |                                        |                                        |                                        |
|----------------------------|-----------------------------------------|-----------------------------------------|----------------------------------------|----------------------------------------|----------------------------------------|----------------------------------------|
| Failure Stretch ratio      | 1.63 (1.49, 1.97) vs 1.57 (1.46, 1.69)  | 1.63 (1.49, 1.97) vs 1.50 (1.25, 1.91)  | 1.57 (1.46, 1.69) vs 1.50 (1.25, 1.91) | 1.75 (1.52, 1.85) vs 2.02 (1.88, 2.32) | 1.75 (1.52, 1.85) vs 1.70 (1.66, 1.82) | 2.02 (1.88, 2.32) vs 1.70 (1.66, 1.82) |
| p                          | 0.2                                     | 0.2                                     | 0.4                                    | 0.085                                  | 0.5                                    | 0.041                                  |
| Peak Tangent Modulus (kPa) | 4388 (2810, 8809) vs 6197 (3808, 9019)  | 4388 (2810, 8809) vs 3988 (2494, 8152)  | 6197 (3808, 9019) vs 3988 (2494, 8152) | 1375 (938, 1575) vs 605 (484, 1085)    | 1375 (938, 1575) vs 2436 (903, 3418)   | 605 (484, 1085) vs 2436 (903, 3418)    |
| p                          | 0.4                                     | 0.3                                     | 0.2                                    | 0.06                                   | 0.4                                    | 0.1                                    |
|                            | Sinus Circumferential                   |                                         |                                        | Sinus Longitudinal                     |                                        |                                        |
|                            | RCS vs LCS                              | RCS vs NCS                              | LCS vs NCS                             | RCS vs LCS                             | RCS vs NCS                             | LCS vs NCS                             |
| Failure Stress (kPa)       | 1338 (1046, 2682) vs 2205 (1067, 2699)  | 1338 (1046, 2682) vs 1135 (749, 2126)   | 2205 (1067, 2699) vs 1135 (749, 2126)  | 332 (288, 539) vs 342 (211, 546)       | 332 (288, 539) vs 576 (437, 782)       | 342 (211, 546) vs 576 (437, 782)       |
| p                          | N/A                                     | N/A                                     | 0.3                                    | 0.3                                    | 0.09                                   | 0.2                                    |
| Failure Stretch ratio      | 1.82 (1.59, 2.05) vs 1.86 (1.73, 2.03)  | 1.82 (1.59, 2.05) vs 1.50 (1.41, 1.80)  | 1.86 (1.73, 2.03) vs 1.50 (1.41, 1.80) | 1.65 (1.53, 2.41) vs 1.82 (1.57, 1.90) | 1.65 (1.53, 2.41) vs 1.80 (1.69, 1.93) | 1.82 (1.57, 1.90) vs 1.80 (1.69, 1.93) |
| p                          | N/A                                     | N/A                                     | 0.07                                   | 0.4                                    | 0.3                                    | 0.5                                    |
| Peak Tangent Modulus (kPa) | 6147 (4038, 11141) vs 6853 (950, 10190) | 6147 (4038, 11141) vs 4783 (4386, 6603) | 6853 (950, 10190) vs 4783 (4386, 6603) | 855 (420, 1184) vs 527 (305, 867)      | 855 (420, 1184) vs 1111 (843, 2073)    | 527 (305, 867) vs 1111 (843, 2073)     |
| p                          | N/A                                     | N/A                                     | 0.5                                    | 0.3                                    | 0.3                                    | 0.1                                    |

419 RCS: right coronary sinus. LCS: left coronary sinus. NCS: noncoronary sinus.

420

421
